# Supplementary material for: The Role of Patient Navigators in Building a Medical Home for Multiply Diagnosed HIV-Positive Homeless Populations
Source: PubMed Central journal article supplement — J Public Health Manag Pract. 2017 Mar 28;23(3):276–82. doi: 10.1097/PHH.0000000000000512 (PMC5381478; doi:10.1097/phh.0000000000000512), 2017-03-28
Supplement: jpump-23-276-s001.pdf [file jpump-23-276-s001.pdf]

---

## Staff Interview Guide Content Areas & Sample Items

---

| Content Area                          | Sample Items                                                                                                                                                                                                                                                                                                                                                                                                                           |
|---------------------------------------|----------------------------------------------------------------------------------------------------------------------------------------------------------------------------------------------------------------------------------------------------------------------------------------------------------------------------------------------------------------------------------------------------------------------------------------|
| <b>Comprehensive care delivery</b>    | <ul style="list-style-type: none"> <li>• <i>Is there a designated team for SPNS patients and if so, is it documented in the chart?</i></li> <li>• <i>How often does the team meet to discuss SPNS patients? Please tell us about both informal and formal meetings.</i></li> <li>• <i>Is there a care plan documented in the chart?</i></li> </ul>                                                                                     |
| <b>Patient-centered care delivery</b> | <ul style="list-style-type: none"> <li>• <i>What discussions do you have around patient's self-management of health care? How is this information documented?</i></li> <li>• <i>Are there specific guidelines or tools that you use with patients to help them make decisions about their health care needs and treatment?</i></li> <li>• <i>How does the agency document end of life wishes for the target population?</i></li> </ul> |
| <b>Coordination of care</b>           | <ul style="list-style-type: none"> <li>• <i>What staff is going out to the field and community to provide medical care and other support services to the homeless populations?</i></li> <li>• <i>How are behavioral health services documented in the medical chart?</i></li> <li>• <i>How do you follow up on emergency room visits and inpatient hospitalizations?</i></li> </ul>                                                    |
| <b>Enhanced access</b>                | <ul style="list-style-type: none"> <li>• <i>Is there open access (walk in appointments) for HIV, primary care and behavioral health services?</i></li> <li>• <i>Are there weekend and evening hours for HIV, primary care and behavioral health services?</i></li> <li>• <i>How are reminders about health care appointments especially for maintenance provided to patients?</i></li> </ul>                                           |
| <b>Ensuring quality and safety</b>    | <ul style="list-style-type: none"> <li>• <i>What quality measures are being collected for this patient population?</i></li> <li>• <i>Does the organization use any clinical support decision tools? If yes, in what areas?</i></li> <li>• <i>Are there regular patient satisfaction surveys or other measures of patients' experiences? Are these given to SPNS patients?</i></li> </ul>                                               |
| <b>Impacts of payment reform</b>      | <ul style="list-style-type: none"> <li>• <i>Are any reimbursement changes associated with your PCMH?</i></li> <li>• <i>Are there specific patient populations among the SPNS target group that have challenges in obtaining health insurance coverage?</i></li> <li>• <i>What roles are SPNS intervention staff playing in payment reform?</i></li> </ul>                                                                              |

---
