# Supplementary material for: The Role of Patient Navigators in Building a Medical Home for Multiply Diagnosed HIV-Positive Homeless Populations
Source: PubMed Central journal article supplement — J Public Health Manag Pract. 2017 Mar 28;23(3):276–82. doi: 10.1097/PHH.0000000000000512 (PMC5381478; doi:10.1097/phh.0000000000000512), 2017-03-28
Supplement: jpump-23-276-s002.pdf [file jpump-23-276-s002.pdf]

---

## SPNS Navigator Focus Group Guide Content Areas & Sample Items

---

| Content Area                      | Sample Items                                                                                                                                                                                                                                                                                            |
|-----------------------------------|---------------------------------------------------------------------------------------------------------------------------------------------------------------------------------------------------------------------------------------------------------------------------------------------------------|
| <b>Background characteristics</b> | <ul style="list-style-type: none"><li>• <i>How long have you been a patient navigator?</i></li><li>• <i>Please describe your past work and educational background.</i></li><li>• <i>What kind of training did you need to get up to speed when you first started this position?</i></li></ul>           |
| <b>Tasks</b>                      | <ul style="list-style-type: none"><li>• <i>What are your set roles and responsibilities?</i></li><li>• <i>How are they different than others on the team?</i></li><li>• <i>How do you work in conjunction with case managers?</i></li><li>• <i>How do you document your work with others?</i></li></ul> |
| <b>Successes and challenges</b>   | <ul style="list-style-type: none"><li>• <i>What are the successes you have encountered in your job as a patient navigator?</i></li><li>• <i>What are the challenges?</i></li><li>• <i>Can you describe any creative or innovative solutions you have used to deal with the challenges?</i></li></ul>    |

---
